# Supplementary material
Source: Springer Nature journal article supplement (https://www.springermedizin.de/resource/supplementary/12876_2014_1189_MOESM2_ESM.pdf/9438302)
Supplement: MOESM2 [file 9438302]

**0 min**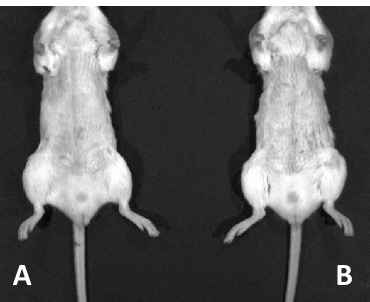**5 min**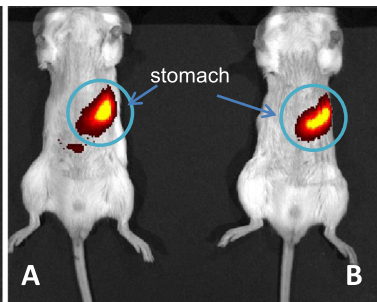**15 min**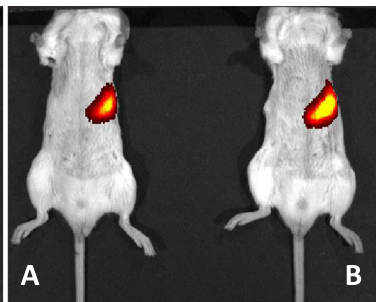**30 min**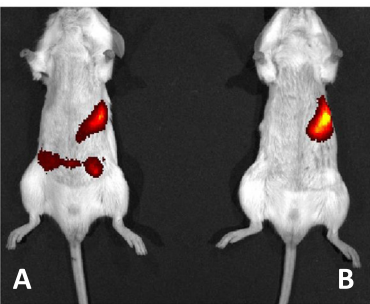**45 min**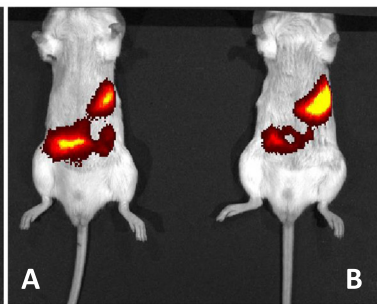**60 min**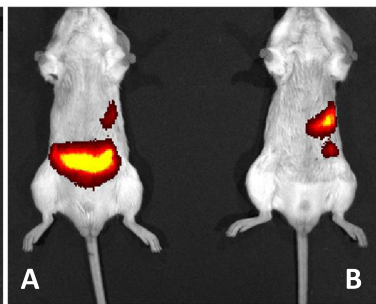

Epi-fluorescence

10.0

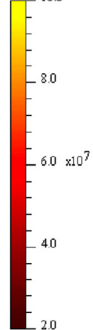

Radiant Efficiency

 $(\text{p/sec/cm}^2/\text{sr})$  $\mu\text{W/cm}^2$ 

Color Scale

Min = 2.00e7

Max = 1.00e8
